# Supplementary material for: Test–retest reliability of an infectious disease questionnaire and evaluation of self-assessed vulnerability to infections: Findings of Pretest 2 of the German National Cohort
Source: Bundesgesundheitsblatt Gesundheitsforschung Gesundheitsschutz. 2014 Oct 8;57(11):1300–7. doi: 10.1007/s00103-014-2045-x (PMC4210725; doi:10.1007/s00103-014-2045-x)
Supplement: Supplementary file 1 — (pdf 136 kb) [file 103_2014_2045_MOESM1_ESM.pdf]

<Für das Studienpersonal: Die ID-Nummer unbedingt auf jeder Seite in das vorgegebene Feld schreiben, drucken (Seriendruck) oder kleben>

## Start der Befragung

**S1** Datum

T T

MM

J JJJ

**S2** Uhrzeit

Std.

Min.

**IN0**

Sind Sie seit dem Ausfüllen des ersten Fragebogens zu Infektionskrankheiten vor ca. einer Woche **neu** an einer der folgenden Krankheiten (Infekt der Atemwege (inkl. Lunge)/des Magen-Darm-Trakts/der Niere oder Harnblase, Lippenherpes, Abszess oder Furunkel) erkrankt?

Ja ☐

Nein ☐

Weiß nicht ☐

## Infektionskrankheiten / Infektionen

Im folgenden Abschnitt (Fragen IN1 bis IN7) geht es um die **Häufigkeit** von unterschiedlichen Infektionen **in den vergangenen 12 Monaten**. Zählen Sie bitte zusammen, wie oft Sie in den vergangenen 12 Monaten an diesen Infektionen litten. Wenn Sie beispielsweise in den vergangenen 12 Monaten 3-mal Schnupfen und 1-mal Mittelohrinfektion hatten, dann sind es insgesamt 4 Infektionsepisoden (somit wählen Sie die Antwortmöglichkeit „3-4-mal“). Wenn Sie 5-mal Schnupfen hatten und keine anderen Infektionen der oberen Atemwege, dann wählen Sie die Antwortmöglichkeit „Mehr als 4-mal“.

**Wichtig!** Die Fragen IN1 bis IN7 beziehen sich auf die vergangenen 12 Monate.

**IN1** Wie häufig hatten Sie in den vergangenen 12 Monaten eine Infektion der oberen Atemwege (z.B. Schnupfen, oder Infektionen von Nasennebenhöhlen, Mandeln, Mittelohr, Rachen, Kehlkopf)?

Keine

☐

1-mal

☐

2-mal

☐

3-4-mal

☐

Mehr als 4-mal

☐

Weiß nicht

☐

**IN1a** Waren Sie wegen mindestens einer dieser Infektionen in **ambulanter** ärztlicher Behandlung (Praxis oder Klinik)?

Ja ☐

Nein ☐

Weiß nicht ☐

**IN1b** Wurden Sie wegen mindestens einer dieser Infektionen **stationär** behandelt (d.h. mindestens eine Nacht im Krankenhaus)?

Ja ☐

Nein ☐

Weiß nicht ☐

<Für das Studienpersonal: Die ID-Nummer unbedingt auf jeder Seite in das vorgegebene Feld schreiben, drucken (Seriendruck) oder kleben>

**IN2** Wie häufig hatten Sie in den vergangenen 12 Monaten eine Infektion der unteren Atemwege (z.B. Bronchitis oder Lungenentzündung)?

|                          |                          |                          |                          |                          |                          |
|--------------------------|--------------------------|--------------------------|--------------------------|--------------------------|--------------------------|
| Keine                    | 1-mal                    | 2-mal                    | 3-4-mal                  | Mehr als 4-mal           | Weiß nicht               |
| <input type="checkbox"/> |

**IN2a** Waren Sie wegen mindestens einer dieser Infektionen in **ambulanter** ärztlicher Behandlung (Praxis oder Klinik)?

Ja ☐                      Nein ☐                      Weiß nicht ☐

**IN2b** Wurden Sie wegen mindestens einer dieser Infektionen **stationär** behandelt (d.h. mindestens eine Nacht im Krankenhaus)?

Ja ☐                      Nein ☐                      Weiß nicht ☐

**IN3** Wie häufig hatten Sie in den vergangenen 12 Monaten eine Infektion des Magen-Darm-Traktes (Durchfall mit oder ohne Erbrechen, auch bekannt als „Magen-Darm-Grippe“)?

|                          |                          |                          |                          |                          |                          |
|--------------------------|--------------------------|--------------------------|--------------------------|--------------------------|--------------------------|
| Keine                    | 1-mal                    | 2-mal                    | 3-4-mal                  | Mehr als 4-mal           | Weiß nicht               |
| <input type="checkbox"/> |

**IN3a** Waren Sie wegen mindestens einer dieser Infektionen in **ambulanter** ärztlicher Behandlung (Praxis oder Klinik)?

Ja ☐                      Nein ☐                      Weiß nicht ☐

**IN3b** Wurden Sie wegen mindestens einer dieser Infektionen **stationär** behandelt (d.h. mindestens eine Nacht im Krankenhaus)?

Ja ☐                      Nein ☐                      Weiß nicht ☐

**IN4** Wie häufig hatten Sie in den vergangenen 12 Monaten Lippenherpes?

|                          |                          |                          |                          |                          |                          |
|--------------------------|--------------------------|--------------------------|--------------------------|--------------------------|--------------------------|
| Keine                    | 1-mal                    | 2-mal                    | 3-4-mal                  | Mehr als 4-mal           | Weiß nicht               |
| <input type="checkbox"/> |

**IN5** Wie häufig hatten Sie in den vergangenen 12 Monaten eine der folgenden Haut- oder Schleimhautinfektionen?

Furunkel oder Abszess (einfache „Pickel“ nicht zählen)

|                          |                          |                          |                          |                          |                          |
|--------------------------|--------------------------|--------------------------|--------------------------|--------------------------|--------------------------|
| Keine                    | 1-mal                    | 2-mal                    | 3-4-mal                  | Mehr als 4-mal           | Weiß nicht               |
| <input type="checkbox"/> |

**IN6** Wie häufig hatten Sie in den vergangenen 12 Monaten eine Infektion der Harnblase („Blasenentzündung“)?

|                          |                          |                          |                          |                          |                          |
|--------------------------|--------------------------|--------------------------|--------------------------|--------------------------|--------------------------|
| Keine                    | 1-mal                    | 2-mal                    | 3-4-mal                  | Mehr als 4-mal           | Weiß nicht               |
| <input type="checkbox"/> |

<Für das Studienpersonal: Die ID-Nummer unbedingt auf jeder Seite in das vorgegebene Feld schreiben, drucken (Seriendruck) oder kleben>

**IN7** Wie häufig hatten Sie in den vergangenen 12 Monaten eine Infektion („Entzündung“) der Niere oder des Nierenbeckens?

|                          |                          |                          |                          |                          |                          |
|--------------------------|--------------------------|--------------------------|--------------------------|--------------------------|--------------------------|
| Keine                    | 1-mal                    | 2-mal                    | 3-4-mal                  | Mehr als 4-mal           | Weiß nicht               |
| <input type="checkbox"/> |

### Infekthäufigkeit

**IH1** Verglichen mit anderen Menschen in meiner Altersgruppe leide ich an akuten Infekten der Atemwege (z.B. Schnupfen, oder Infektionen von Nasennebenhöhlen, Mandeln, Mittelohr, Rachen, Kehlkopf)...

|                          |                          |                          |                          |                          |
|--------------------------|--------------------------|--------------------------|--------------------------|--------------------------|
| Viel seltener            | Seltener                 | Etwa gleich oft          | Öfter                    | Viel öfter               |
| <input type="checkbox"/> |

**IH2** Verglichen mit anderen Menschen in meiner Altersgruppe leide ich an akuten Infekten der unteren Atemwege (Bronchitis oder Lungenentzündung)...

|                          |                          |                          |                          |                          |
|--------------------------|--------------------------|--------------------------|--------------------------|--------------------------|
| Viel seltener            | Seltener                 | Etwa gleich oft          | Öfter                    | Viel öfter               |
| <input type="checkbox"/> |

**IH3** Verglichen mit anderen Menschen in meiner Altersgruppe leide ich an akuten Infekten des Verdauungstraktes (Durchfall mit oder ohne Erbrechen)...

|                          |                          |                          |                          |                          |
|--------------------------|--------------------------|--------------------------|--------------------------|--------------------------|
| Viel seltener            | Seltener                 | Etwa gleich oft          | Öfter                    | Viel öfter               |
| <input type="checkbox"/> |

**IH4** Verglichen mit anderen Frauen [Männern] in meiner Altersgruppe leide ich an akuten Infektionen der Harnblase, Niere oder Nierenbecken...

|                          |                          |                          |                          |                          |
|--------------------------|--------------------------|--------------------------|--------------------------|--------------------------|
| Viel seltener            | Seltener                 | Etwa gleich oft          | Öfter                    | Viel öfter               |
| <input type="checkbox"/> |

**IH5** Verglichen mit anderen Menschen in meiner Altersgruppe leide ich an Infektionen der Haut (z.B. Furunkel oder Abszess. Einfache „Pickel“ nicht zählen)....

|                          |                          |                          |                          |                          |
|--------------------------|--------------------------|--------------------------|--------------------------|--------------------------|
| Viel seltener            | Seltener                 | Etwa gleich oft          | Öfter                    | Viel öfter               |
| <input type="checkbox"/> |

### Antibiotikaeinnahme

**A1** Wie häufig hat Ihnen in den vergangenen 12 Monaten ein Arzt Antibiotika verschrieben?

**Auch zählen wenn Sie das Medikament nicht eingenommen haben!**

Salben oder andere äußere Anwendungen nicht mitzählen.

|                          |                          |                          |                          |                          |                          |
|--------------------------|--------------------------|--------------------------|--------------------------|--------------------------|--------------------------|
| Keine                    | 1-mal                    | 2-mal                    | 3-4-mal                  | Mehr als 4-mal           | Weiß nicht               |
| <input type="checkbox"/> |

<Für das Studienpersonal: Die ID-Nummer unbedingt auf jeder Seite in das vorgegebene Feld schreiben, drucken (Seriendruck) oder kleben>

**Anmerkung! Die Fragen F1 bis F3 beziehen sich auf die vergangenen 12 Monate.**

|           |                                                                                                     |                          |                          |                          |                          |                          |
|-----------|-----------------------------------------------------------------------------------------------------|--------------------------|--------------------------|--------------------------|--------------------------|--------------------------|
| <b>F1</b> | Wie häufig hatten Sie <u>in den vergangenen 12 Monaten</u> Husten, der länger als 4 Wochen dauerte? |                          |                          |                          |                          |                          |
|           | Keine                                                                                               | 1-mal                    | 2-mal                    | 3-4-mal                  | Mehr als 4-mal           | Weiß nicht               |
|           | <input type="checkbox"/>                                                                            | <input type="checkbox"/> | <input type="checkbox"/> | <input type="checkbox"/> | <input type="checkbox"/> | <input type="checkbox"/> |

|           |                                                                                                                                                                                      |                          |                          |                          |                          |                          |
|-----------|--------------------------------------------------------------------------------------------------------------------------------------------------------------------------------------|--------------------------|--------------------------|--------------------------|--------------------------|--------------------------|
| <b>F2</b> | Wie häufig hatten Sie <u>in den vergangenen 12 Monaten</u> Fieber (>38°C)? (wenn das Fieber länger als 1 Tag dauerte, bitte als eine Episode zählen; z.B. Fieber für 7 Tage = 1-mal) |                          |                          |                          |                          |                          |
|           | Keine                                                                                                                                                                                | 1-mal                    | 2-mal                    | 3-4-mal                  | Mehr als 4-mal           | Weiß nicht               |
|           | <input type="checkbox"/>                                                                                                                                                             | <input type="checkbox"/> | <input type="checkbox"/> | <input type="checkbox"/> | <input type="checkbox"/> | <input type="checkbox"/> |

|           |                                                                                                                                                                                                                                                                                          |                          |                          |                          |                          |                          |
|-----------|------------------------------------------------------------------------------------------------------------------------------------------------------------------------------------------------------------------------------------------------------------------------------------------|--------------------------|--------------------------|--------------------------|--------------------------|--------------------------|
| <b>F3</b> | Wie häufig hatten Sie <u>in den vergangenen 12 Monaten</u> Durchfall? Durchfall ist definiert als mindestens 3-mal flüssiger/breiiger Stuhlgang innerhalb von 24 Stunden (wenn der Durchfall länger als 1 Tag dauerte, bitte als eine Episode zählen; z.B. Durchfall für 4 Tage = 1-mal) |                          |                          |                          |                          |                          |
|           | Keine                                                                                                                                                                                                                                                                                    | 1-mal                    | 2-mal                    | 3-4-mal                  | Mehr als 4-mal           | Weiß nicht               |
|           | <input type="checkbox"/>                                                                                                                                                                                                                                                                 | <input type="checkbox"/> | <input type="checkbox"/> | <input type="checkbox"/> | <input type="checkbox"/> | <input type="checkbox"/> |

**Impfungen**

|           |                                                                  |                                                                                                                                                                                                                                                                                                                                                                                                                                                 |                            |
|-----------|------------------------------------------------------------------|-------------------------------------------------------------------------------------------------------------------------------------------------------------------------------------------------------------------------------------------------------------------------------------------------------------------------------------------------------------------------------------------------------------------------------------------------|----------------------------|
| <b>V1</b> | Wurden Sie <b>jemals</b> gegen Grippe (Influenza) geimpft?       | <input type="checkbox"/> Ja<br><input type="checkbox"/> Nein -----> weiter zu Frage<br><input type="checkbox"/> Weiß nicht -----> weiter zu Frage                                                                                                                                                                                                                                                                                               | <b>T1</b><br><br><b>T1</b> |
| <b>V2</b> | In welcher Regelmäßigkeit lassen Sie sich gegen Grippe impfen?   | <input type="checkbox"/> Jedes Jahr; seit wann:    Jahr: <input type="text"/> <input type="text"/> <input type="text"/> <input type="text"/><br><input type="checkbox"/> Fast jedes Jahr; seit wann: Jahr: <input type="text"/> <input type="text"/> <input type="text"/> <input type="text"/><br><input type="checkbox"/> Seltener als fast jedes Jahr<br><input type="checkbox"/> Bis jetzt nur einmal<br><input type="checkbox"/> Weiß nicht |                            |
| <b>V3</b> | Wann wurden Sie <b>zuletzt</b> gegen Grippe (Influenza) geimpft? | <input type="checkbox"/> Jahr: <input type="text"/> <input type="text"/> <input type="text"/> <input type="text"/> <input type="text"/><br>oder<br><input type="checkbox"/> Weiß nicht                                                                                                                                                                                                                                                          |                            |

<Für das Studienpersonal: Die ID-Nummer unbedingt auf jeder Seite in das vorgegebene Feld schreiben, drucken (Seriendruck) oder kleben>

**Tiere**

**T1** Hatten Sie jemals über einen Zeitraum von mehr als sechs Monaten, privat oder beruflich, regelmäßig (d.h. mehr als einmal pro Woche) Umgang mit Haustieren? ☐ Ja ☐ Nein -----> weiter zu Frage **T2** ☐ Weiß nicht -----> weiter zu Frage **T2**

Wenn Ja, mit welchem Tier/mit welchen Tieren?

|                                                                  | Ja                       | Nein                     | Weiß nicht               |
|------------------------------------------------------------------|--------------------------|--------------------------|--------------------------|
| Hund                                                             | <input type="checkbox"/> | <input type="checkbox"/> | <input type="checkbox"/> |
| Katze                                                            | <input type="checkbox"/> | <input type="checkbox"/> | <input type="checkbox"/> |
| Nagetier (z.B. Hamster, Kaninchen, Meerschweinchen, Maus, Ratte) | <input type="checkbox"/> | <input type="checkbox"/> | <input type="checkbox"/> |
| Ziervogel (z.B. Wellensittich, Papagei, Taube)                   | <input type="checkbox"/> | <input type="checkbox"/> | <input type="checkbox"/> |
| Reptilien (z.B. Schildkröten, Leguane, Schlangen)                | <input type="checkbox"/> | <input type="checkbox"/> | <input type="checkbox"/> |
| Andere Tiere, wenn ja, welche?                                   | .....                    |                          |                          |

**T2** Leben in Ihrem Haushalt Haustiere? ☐ Ja ☐ Nein-----> weiter zu Frage **S3** ☐ Weiß nicht-----> weiter zu Frage **S3**

Wenn Ja, welches Tier/welche Tiere?

|                                                                  | Ja, ausschließlich in der Wohnung | Ja, in oder außerhalb der Wohnung | Wenn Ja, Anzahl | Nein                     | Weiß nicht               |
|------------------------------------------------------------------|-----------------------------------|-----------------------------------|-----------------|--------------------------|--------------------------|
| Hund                                                             | <input type="checkbox"/>          | <input type="checkbox"/>          | .....           | <input type="checkbox"/> | <input type="checkbox"/> |
| Katze                                                            | <input type="checkbox"/>          | <input type="checkbox"/>          | .....           | <input type="checkbox"/> | <input type="checkbox"/> |
| Nagetier (z.B. Hamster, Kaninchen, Meerschweinchen, Maus, Ratte) | <input type="checkbox"/>          | <input type="checkbox"/>          | .....           | <input type="checkbox"/> | <input type="checkbox"/> |
| Ziervogel (z.B. Wellensittich, Papagei, Taube)                   | <input type="checkbox"/>          | <input type="checkbox"/>          | .....           | <input type="checkbox"/> | <input type="checkbox"/> |
| Reptilien (z.B. Schildkröten, Leguane, Schlangen)                | <input type="checkbox"/>          | <input type="checkbox"/>          | .....           | <input type="checkbox"/> | <input type="checkbox"/> |
| Andere Tiere, wenn ja, welche?                                   | .....                             |                                   |                 |                          |                          |

**Ende der Befragung**

**S3** Uhrzeit Befragung Ende

|  |  |
|--|--|
|  |  |
|--|--|

Std.

|  |  |
|--|--|
|  |  |
|--|--|

Min.
